# Supplementary material for: TFAP2A promotes cervical cancer via a positive feedback pathway with PD‑L1
Source: PubMed Central journal article supplement — Oncol Rep. 2023 Apr 20;49(6):114. doi: 10.3892/or.2023.8551 (PMC10170487; doi:10.3892/or.2023.8551), 2023-04-20
Supplement: Supplementary_Data.pdf [file Supplementary_Data.pdf]

**Table S1.** Sequences of primers used for RT-qPCR and sequences of nucleic acids for RNA interference.

| Gene name        | Utilization     | Primer sequence (5'→3')    |
|------------------|-----------------|----------------------------|
| TFAP2A           | RT-qPCR         | F: AGGTCAATCTCCCTACACGAG   |
|                  |                 | R: GGAGTAAGGATCTTGCGACTGG  |
|                  | shRNA1          | TGAATTTCTCAACCGACAA        |
|                  | shRNA2          | CACGGACAACAACGCCAAATT      |
| PD-L1            | RT-qPCR         | F: CCAAGGCCGAAGTCATCTGG    |
|                  |                 | R: CAGTGTGCTGGTCACATTGAA   |
|                  | ChIP            | F: TTCCTAGGACACCAACACTAGA  |
|                  |                 | R: ACGCGCCAGCTGCTCAGCGTT   |
|                  | shRNA1          | GGTTCCTCAAGGACCTATATG      |
|                  | shRNA2          | GGAGATTAGATCCTGAGGA        |
| HPV 16 E6        | shRNA1          | GAATGTGTGTAAGTCAAGC        |
|                  | shRNA2          | GAGATACACCTACATTGCATGAATA  |
| GAPDH            | RT-qPCR         | F: GGAGCGAGATCCCTCCAAAAT   |
|                  |                 | R: GGCTGTTGTCATACTTCTCATGG |
| Negative control | shRNA control   | TTCTCCGAACGTGTCACGTTT      |
| PPARG            | Positive primer | F: GCAGCACCACCGATCAGAAG    |
|                  | used for ChIP   | R: GCCCAGAGAGGGTCCCATT     |

RT-qPCR, reverse transcription-quantitative PCR; F, forward; R, reverse; TFAP2A, transcription factor AP-2 alpha; PD-L1, programmed death-ligand 1; shRNA, short hairpin RNA; ChIP, chromatin immunoprecipitation.

**Table SII.** List of antibodies used for western blot analysis.

| <b>Antigen name</b> | <b>Cat. no.</b> | <b>Supplier</b>                 |
|---------------------|-----------------|---------------------------------|
| TFAP2A              | 67076-1-Ig      | Proteintech Group, Inc.         |
| PD-L1               | 13684S          | Cell Signaling Technology, Inc. |
| GAPDH               | 60004-1-Ig      | Proteintech Group, Inc.         |
| HPV 16 E6           | Ab70            | Abcam                           |

TFAP2A, transcription factor AP-2 alpha; PD-L1, programmed death-ligand 1.
